# Supplementary material
Source: MDPI journal article supplement (https://www.mdpi.com/2304-6740/7/2/15)

# checkCIF/PLATON report

You have not supplied any structure factors. As a result the full set of tests cannot be run.

No syntax errors found.      CIF dictionary      Interpreting this report

## Datablock: 1

---

Bond precision:   Mn- O = 0.0030 A                      Wavelength=0.71073

Cell:                a=12.132(3)                b=12.290(3)                c=13.130(4)  
                      alpha=73.394(10)        beta=67.727(10)        gamma=73.205(11)

Temperature:    150 K

|                | Calculated                       | Reported               |
|----------------|----------------------------------|------------------------|
| Volume         | 1699.7(8)                        | 1699.7(8)              |
| Space group    | P -1                             | P-1                    |
| Hall group     | -P 1                             | ?                      |
| Moiety formula | H6 Mn O24 W6, 14(O), K,<br>2(Na) | ?                      |
| Sum formula    | H6 K Mn Na2 O38 W6               | H62 K2 Mn2 Na4 O76 W12 |
| Mr             | 1857.11                          | 3764.74                |
| Dx,g cm-3      | 3.629                            | 3.678                  |
| Z              | 2                                | 1                      |
| Mu (mm-1)      | 20.844                           | 20.846                 |
| F000           | 1640.0                           | 1690.0                 |
| F000'          | 1633.38                          |                        |
| h,k,lmax       | 17,17,18                         | 17,17,18               |
| Nref           | 9985                             | 9922                   |
| Tmin,Tmax      | 0.094,0.434                      | 0.091,0.489            |
| Tmin'          | 0.009                            |                        |

Correction method= MULTI-SCAN

Data completeness= 0.994                      Theta(max)= 30.070

R(reflections)= 0.0340( 9472)                wR2(reflections)= 0.0981( 9922)

S = 1.174                                      Npar= 460

---

The following ALERTS were generated. Each ALERT has the format  
**test-name\_ALERT\_alert-type\_alert-level.**

Click on the hyperlinks for more details of the test.

---

### Alert level B

|                                                            |       |                        |           |
|------------------------------------------------------------|-------|------------------------|-----------|
| PLAT222_ALERT_3_B Large Non-Solvent                        | H     | Uiso(max)/Uiso(min) .. | 8.2 Ratio |
| PLAT306_ALERT_2_B Isolated Oxygen Atom (H-atoms Missing ?) | ..... |                        | O1W       |
| PLAT306_ALERT_2_B Isolated Oxygen Atom (H-atoms Missing ?) | ..... |                        | O2W       |

|                   |                                          |       |      |
|-------------------|------------------------------------------|-------|------|
| PLAT306_ALERT_2_B | Isolated Oxygen Atom (H-atoms Missing ?) | ..... | O3W  |
| PLAT306_ALERT_2_B | Isolated Oxygen Atom (H-atoms Missing ?) | ..... | O4W  |
| PLAT306_ALERT_2_B | Isolated Oxygen Atom (H-atoms Missing ?) | ..... | O5W  |
| PLAT306_ALERT_2_B | Isolated Oxygen Atom (H-atoms Missing ?) | ..... | O6W  |
| PLAT306_ALERT_2_B | Isolated Oxygen Atom (H-atoms Missing ?) | ..... | O7W  |
| PLAT306_ALERT_2_B | Isolated Oxygen Atom (H-atoms Missing ?) | ..... | O8W  |
| PLAT306_ALERT_2_B | Isolated Oxygen Atom (H-atoms Missing ?) | ..... | O9W  |
| PLAT306_ALERT_2_B | Isolated Oxygen Atom (H-atoms Missing ?) | ..... | O10W |
| PLAT306_ALERT_2_B | Isolated Oxygen Atom (H-atoms Missing ?) | ..... | O11W |
| PLAT306_ALERT_2_B | Isolated Oxygen Atom (H-atoms Missing ?) | ..... | O12W |
| PLAT306_ALERT_2_B | Isolated Oxygen Atom (H-atoms Missing ?) | ..... | O13W |
| PLAT306_ALERT_2_B | Isolated Oxygen Atom (H-atoms Missing ?) | ..... | O14W |

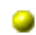

### Alert level C

CHEMW03\_ALERT\_2\_C The ratio of given/expected molecular weight as calculated from the \_atom\_site\* data lies outside the range 0.99 <> 1.01

From the CIF: \_cell\_formula\_units\_Z 1

From the CIF: \_chemical\_formula\_weight 3764.74

TEST: Calculate formula weight from \_atom\_site\_\*

| atom | mass   | num   | sum     |
|------|--------|-------|---------|
| O    | 16.00  | 76.00 | 1215.92 |
| H    | 1.01   | 12.00 | 12.10   |
| Mn   | 54.94  | 2.00  | 109.88  |
| W    | 183.85 | 12.00 | 2206.20 |
| Na   | 22.99  | 4.00  | 91.96   |
| K    | 39.10  | 2.00  | 78.20   |

Calculated formula weight 3714.25

|                   |                                                  |         |         |   |
|-------------------|--------------------------------------------------|---------|---------|---|
| PLAT041_ALERT_1_C | Calc. and Reported SumFormula                    | Strings | Differ  | ? |
| PLAT043_ALERT_1_C | Check Reported Molecular Weight                  | .....   | 3764.74 |   |
| PLAT068_ALERT_1_C | Reported F000 Differs from Calcd (or Missing)... |         |         | ? |

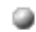

### Alert level G

FORMU01\_ALERT\_2\_G There is a discrepancy between the atom counts in the \_chemical\_formula\_sum and the formula from the \_atom\_site\* data.

Atom count from \_chemical\_formula\_sum: H62 K2 Mn2 Na4 O76 W12

Atom count from the \_atom\_site data: H12 K2 Mn2 Na4 O76 W12

CELLZ01\_ALERT\_1\_G Difference between formula and atom\_site contents detected.

CELLZ01\_ALERT\_1\_G WARNING: H atoms missing from atom site list. Is this intentional?

From the CIF: \_cell\_formula\_units\_Z 1

From the CIF: \_chemical\_formula\_sum H62 K2 Mn2 Na4 O76 W12

TEST: Compare cell contents of formula and atom\_site data

| atom | Z*formula | cif sites | diff  |
|------|-----------|-----------|-------|
| H    | 62.00     | 12.00     | 50.00 |
| K    | 2.00      | 2.00      | 0.00  |
| Mn   | 2.00      | 2.00      | 0.00  |
| Na   | 4.00      | 4.00      | 0.00  |
| O    | 76.00     | 76.00     | 0.00  |
| W    | 12.00     | 12.00     | 0.00  |

|                   |                                                  |            |
|-------------------|--------------------------------------------------|------------|
| PLAT002_ALERT_2_G | Number of Distance or Angle Restraints on AtSite | 6          |
| PLAT004_ALERT_5_G | Info: Polymeric Structure Found with Dimension   | 1          |
| PLAT005_ALERT_5_G | No _iucr_refine_instructions_details in the CIF  | ?          |
| PLAT045_ALERT_1_G | Calculated and Reported Z Differ by .....        | 2.00 Ratio |
| PLAT083_ALERT_2_G | SHELXL Second Parameter in WGHT Unusually Large. | 13.12      |
| PLAT232_ALERT_2_G | Hirshfeld Test Diff (M-X) W2 -- O7 ..            | 5.2 su     |
| PLAT232_ALERT_2_G | Hirshfeld Test Diff (M-X) W6 -- O20 ..           | 5.4 su     |
| PLAT774_ALERT_1_G | Suspect X-Y Bond in CIF: W6 -- K1 ..             | 3.69 Ang.  |
| PLAT774_ALERT_1_G | Suspect X-Y Bond in CIF: K1 -- NA3 ..            | 3.89 Ang.  |

```

PLAT774_ALERT_1_G Suspect X-Y Bond in CIF:  K1      --  NA2      ..      3.95 Ang.
PLAT774_ALERT_1_G Suspect X-Y Bond in CIF:  K1      --  NA4      ..      4.20 Ang.
PLAT774_ALERT_1_G Suspect X-Y Bond in CIF:  NA2      --  K1      ..      3.95 Ang.
PLAT774_ALERT_1_G Suspect X-Y Bond in CIF:  NA4      --  K1      ..      4.20 Ang.
PLAT860_ALERT_3_G Note: Number of Least-Squares Restraints .....      4

```

---

```

 0 ALERT level A = Most likely a serious problem - resolve or explain
15 ALERT level B = A potentially serious problem, consider carefully
 4 ALERT level C = Check. Ensure it is not caused by an omission or oversight
17 ALERT level G = General information/check it is not something unexpected

12 ALERT type 1 CIF construction/syntax error, inconsistent or missing data
20 ALERT type 2 Indicator that the structure model may be wrong or deficient
 2 ALERT type 3 Indicator that the structure quality may be low
 0 ALERT type 4 Improvement, methodology, query or suggestion
 2 ALERT type 5 Informative message, check

```

---

It is advisable to attempt to resolve as many as possible of the alerts in all categories. Often the minor alerts point to easily fixed oversights, errors and omissions in your CIF or refinement strategy, so attention to these fine details can be worthwhile. In order to resolve some of the more serious problems it may be necessary to carry out additional measurements or structure refinements. However, the purpose of your study may justify the reported deviations and the more serious of these should normally be commented upon in the discussion or experimental section of a paper or in the "special\_details" fields of the CIF. checkCIF was carefully designed to identify outliers and unusual parameters, but every test has its limitations and alerts that are not important in a particular case may appear. Conversely, the absence of alerts does not guarantee there are no aspects of the results needing attention. It is up to the individual to critically assess their own results and, if necessary, seek expert advice.

### Publication of your CIF in IUCr journals

A basic structural check has been run on your CIF. These basic checks will be run on all CIFs submitted for publication in IUCr journals (*Acta Crystallographica*, *Journal of Applied Crystallography*, *Journal of Synchrotron Radiation*); however, if you intend to submit to *Acta Crystallographica Section C* or *E*, you should make sure that full publication checks are run on the final version of your CIF prior to submission.

### Publication of your CIF in other journals

Please refer to the *Notes for Authors* of the relevant journal for any special instructions relating to CIF submission.

---

**PLATON version of 24/04/2013; check.def file version of 23/04/2013**

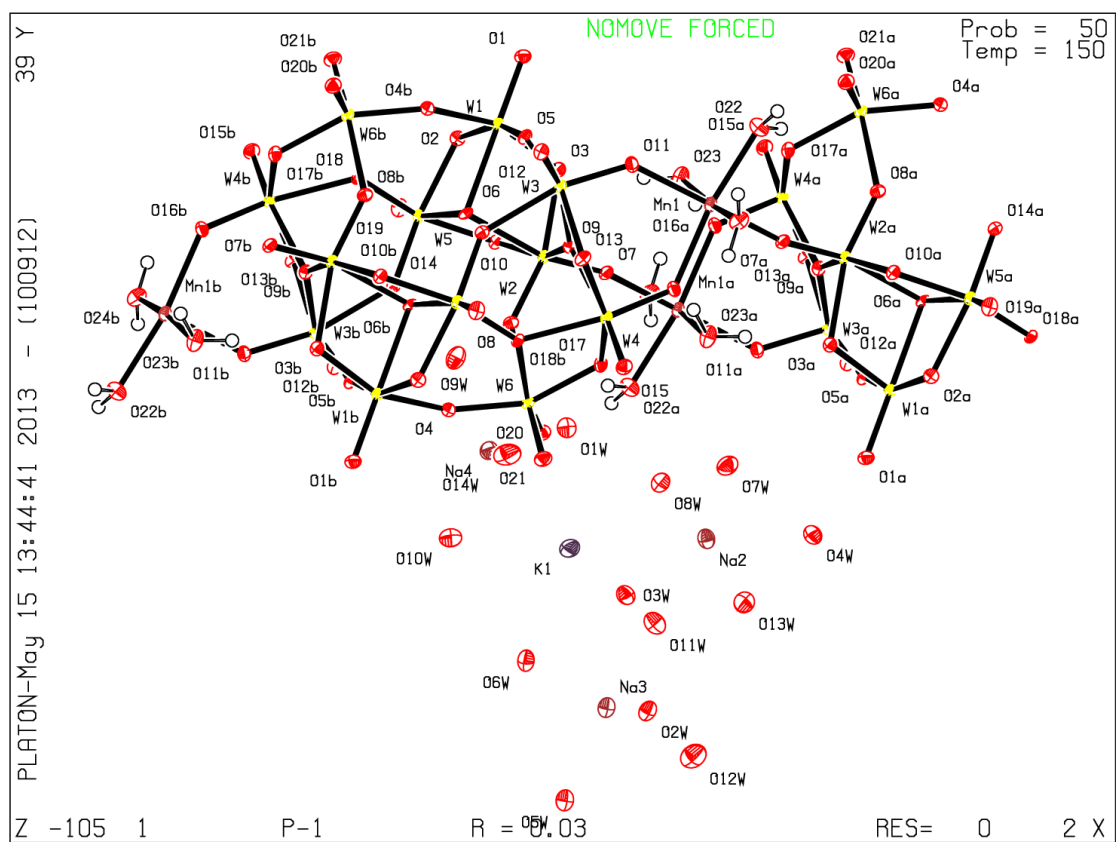

Supplement: s1 [file s1]
