# Supplementary material
Source: MDPI journal article supplement (https://www.mdpi.com/2304-6740/7/2/15)
Supplement: s1 [file s1]

# Supplementary Materials: Synthesis, Crystal Structure, Electrochemistry and Electro-Catalytic Properties of the Manganese-Containing Polyoxotungstate, $[(\text{Mn}(\text{H}_2\text{O})_3)_2(\text{H}_2\text{W}_{12}\text{O}_{42})]^{6-}$

Anne-Lucie Teillout, Pedro de Oliveira, Jérôme Marrot, Robertha C. Howell, Neus Vilà, Alain Walcarius and Israël M. Mbomekallé \*

## S1. Electrochemistry

**S1.1.** Comparison between  $[(\text{Mn}(\text{H}_2\text{O})_3)_2(\text{H}_2\text{W}_{12}\text{O}_{42})]^{6-}$  and its Parent's Counterparts  $[\text{H}_2\text{W}_{12}\text{O}_{40}]^{6-}$  and  $[\text{H}_2\text{W}_{12}\text{O}_{42}]^{10-}$

**S1.2.** Determination of the Diffusion Coefficient

**S1.3.** pH Influence

**S1.4.** Electro-Catalytic Reduction of Nitrite and Dioxygen by **1** on GCE

**S1.5.**  $\text{Mn}^{2+}$  Redox Steps in **1**,  $[\text{Mn}^{\text{II}}(\text{H}_2\text{O})\text{SiW}_{11}\text{O}_{39}]^{6-}$  and  $[\text{Mn}^{\text{II}}_4(\text{H}_2\text{O})_2(\text{SiW}_9\text{O}_{34})_2]^{12-}$

**S1.6.** Influence of the Electrolyte at Different pH Values

## S2. XPS Spectra

## S3. UV-Visible Spectra

## S4. FT-IR Spectra

## S5. Thermogravimetric Analysis

## S1. Electrochemistry

### S1.1. Comparison between $[(\text{Mn}(\text{H}_2\text{O})_3)_2(\text{H}_2\text{W}_{12}\text{O}_{42})]^{6-}$ and its parent's counterparts $[\text{H}_2\text{W}_{12}\text{O}_{40}]^{6-}$ and $[\text{H}_2\text{W}_{12}\text{O}_{42}]^{10-}$

The medium  $0.5\text{M Li}_2\text{SO}_4 + \text{H}_2\text{SO}_4$  / pH 3 was selected for a direct comparison between the electrochemical behaviors of the three parent compounds. In this medium, the reduction of  $[\text{H}_2\text{W}_{12}\text{O}_{42}]^{10-}$  on a glassy carbon electrode (GCE) is irreversible and occurs at very low potential ( $-0.88\text{ V vs. SCE}$ ). This is not surprising given its formal anionic charge,  $-10$ . Polymerization of this polyanion by complexation of two  $\text{Mn}^{2+}$  between two  $[\text{H}_2\text{W}_{12}\text{O}_{42}]^{10-}$  moieties induces several physical and chemical changes that affected electrochemical properties of the new compound, the monomer  $[(\text{Mn}(\text{H}_2\text{O})_3)_2(\text{H}_2\text{W}_{12}\text{O}_{42})]^{6-}$  (**1**). Reduction of **1** becomes easier with three successive one-electron processes located between  $-0.3$  and  $-0.8\text{ V}$ . For better visualization, Figures S2 below show (A) superimposed CVs of  $[\text{H}_2\text{W}_{12}\text{O}_{42}]^{10-}$  and  $[\text{H}_2\text{W}_{12}\text{O}_{40}]^{6-}$  and (B) superimposed CVs of  $[\text{H}_2\text{W}_{12}\text{O}_{40}]^{6-}$  and **1**. Electrochemical properties of  $[\text{H}_2\text{W}_{12}\text{O}_{42}]^{10-}$  are not within the scope of this paper and those of  $[\text{H}_2\text{W}_{12}\text{O}_{40}]^{6-}$  have been largely discussed in several studies.

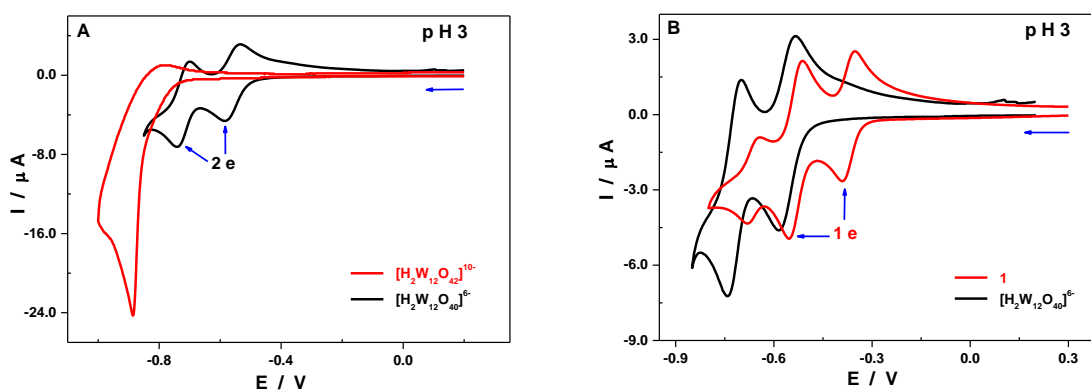

**Figure S1.** CVs of **1**,  $[\text{H}_2\text{W}_{12}\text{O}_{40}]^{6-}$  and  $[\text{H}_2\text{W}_{12}\text{O}_{42}]^{10-}$  in  $0.5\text{M Li}_2\text{SO}_4 + \text{H}_2\text{SO}_4$  / pH 3. Polyoxometalate concentration:  $0.5\text{ mM}$ ; scan rate:  $10\text{ mV}\cdot\text{s}^{-1}$ ; working electrode: glassy carbon; reference electrode: SCE.

(A) Comparison between CV of  $[\text{H}_2\text{W}_{12}\text{O}_{42}]^{10-}$  (red line) and CV of  $[\text{H}_2\text{W}_{12}\text{O}_{40}]^{6-}$  (black line).

(B) Comparison between CV of **1** (red line) and CV of  $[\text{H}_2\text{W}_{12}\text{O}_{40}]^{6-}$  (black line).

### S1.2. Determination of the Diffusion Coefficient

In order to demonstrate that the compound **1** exists as the  $[(\text{Mn}(\text{H}_2\text{O})_3)_2(\text{H}_2\text{W}_{12}\text{O}_{42})]^{6-}$  monomer in solution, its diffusion coefficient, **D**, was determined and compared to that of metatungstate,  $[\text{H}_2\text{W}_{12}\text{O}_{40}]^{6-}$ , a Keggin-type species carrying the same charge as **1**. The CVs of the two compounds were recorded in the same experimental conditions in  $0.5\text{M Li}_2\text{SO}_4 + \text{H}_2\text{SO}_4$ , pH 3.0, at scan rates ranging from  $10$  to  $100\text{ mV}\cdot\text{s}^{-1}$ . The square of the reduction peak current,  $(I_{\text{pc}})^2$ , of the first wave was plotted as a function of the scan rate. The slope of the plot  $(I_{\text{pc}})^2 = f(v)$  allows to estimate the value of the diffusion coefficient of the studied species, according to the Randles - Sevcik equation:  $I_{\text{pc}} = 2.69 \cdot 10^5 \times n^{3/2} \times A \times D^{1/2} \times v^{1/2} \times C$  (see Figure SI-1).

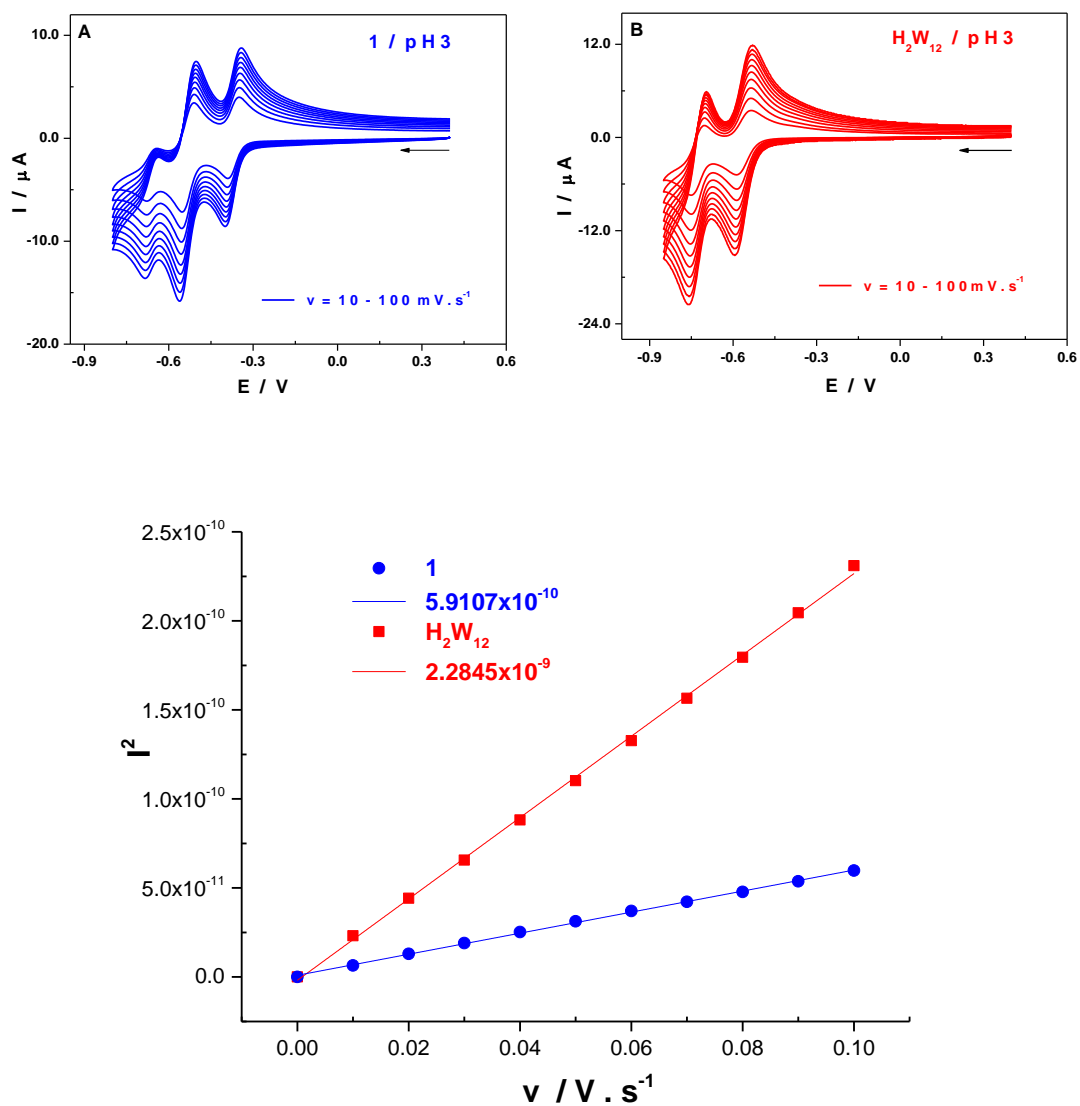

**Figure S2.** CVs of **1** (A) and  $[\text{H}_2\text{W}_{12}\text{O}_{40}]^{6-}$  (B) in 0.5M  $\text{Li}_2\text{SO}_4 + \text{H}_2\text{SO}_4$  / pH 3. Polyoxometalate concentration: 0.5 mM; scan rate varying from 10 to 100  $\text{mV} \cdot \text{s}^{-1}$ ; working electrode: glassy carbon; reference electrode: SCE.

(C) Evolution of the square of the reduction peak current of the first wave as a function of the scan rate,  $(I_{pc})^2 = f(v)$ , for **1** (blue) and for  $[\text{H}_2\text{W}_{12}\text{O}_{40}]^{6-}$  (red).

Table S1.

| <b>1</b> |                                 | <b>[H<sub>2</sub>W<sub>12</sub>O<sub>40</sub>]<sup>6−</sup></b> |                                 |
|----------|---------------------------------|-----------------------------------------------------------------|---------------------------------|
| v        | (I <sub>pc</sub> ) <sup>2</sup> | v                                                               | (I <sub>pc</sub> ) <sup>2</sup> |
| 0        | 0                               | 0                                                               | 0                               |
| 0.01     | 6.5025E-12                      | 0.01                                                            | 2.3136E-11                      |
| 0.02     | 1.3032E-11                      | 0.02                                                            | 4.4223E-11                      |
| 0.03     | 1.901E-11                       | 0.03                                                            | 6.561E-11                       |
| 0.04     | 2.52E-11                        | 0.04                                                            | 8.8172E-11                      |
| 0.05     | 3.1248E-11                      | 0.05                                                            | 1.1025E-10                      |
| 0.06     | 3.7088E-11                      | 0.06                                                            | 1.3271E-10                      |
| 0.07     | 4.225E-11                       | 0.07                                                            | 1.565E-10                       |
| 0.08     | 4.7748E-11                      | 0.08                                                            | 1.7956E-10                      |
| 0.09     | 5.3729E-11                      | 0.09                                                            | 2.0449E-10                      |
| 0.1      | 5.9753E-11                      | 0.1                                                             | 2.3104E-10                      |

Randles - Sevcik equation :  $I_{pc} = 2.69 \cdot 10^5 \times n^{3/2} \times A \times D^{1/2} \times v^{1/2} \times C$

$I_{pc}$  : cathodic peak current (A)

$n$  : number of electrons exchanged per molecule

$A$  : electrode surface (cm<sup>2</sup>) = 0.0707 cm<sup>2</sup>

$D$  : diffusion coefficient (cm<sup>2</sup>·s<sup>−1</sup>)

$v$  : scan rate (V·s<sup>−1</sup>)

$C$  : concentration (mol·cm<sup>−3</sup>)

$$[1] = 5.31 \times 10^{-4} \text{ mol} \cdot \text{L}^{-1} = 5.31 \times 10^{-7} \text{ mol} \cdot \text{cm}^{-3}$$

From the plot  $(I_{pc})^2 = f(v)$  →  $(I_{pc})^2 = (2.69 \times 10^5)^2 \times 1^3 \times (0.0707)^2 \times D \times v \times (5.31 \times 10^{-7})^2$   
 →  $(I_{pc})^2 = 1.02 \times 10^{-4} D \times v$   
 →  $1.02 \times 10^{-4} \times D$  being the slope of the straight line  $(I_{pc})^2 = f(v)$ .

$$\begin{aligned} &\rightarrow 5.9107 \times 10^{-10} = 1.02 \times 10^{-4} \times D \\ &\rightarrow D = 5.9107 \times 10^{-10} / 1.02 \times 10^{-4} \\ &\rightarrow \mathbf{D = 5.78 \times 10^{-6} \text{ cm}^2 \cdot \text{s}^{-1}} \end{aligned}$$

$$[\text{H}_2\text{W}_{12}] = 6.53 \times 10^{-4} \text{ mol} \cdot \text{L}^{-1} = 6.53 \times 10^{-7} \text{ mol} \cdot \text{cm}^{-3}$$

From the plot  $(I_{pc})^2 = f(v)$  →  $(I_{pc})^2 = (2.69 \times 10^5)^2 \times 2^3 \times (0.0707)^2 \times D \times v \times (6.53 \times 10^{-7})^2$   
 →  $(I_{pc})^2 = 1.23 \times 10^{-3} \times D \times v$   
 →  $1.23 \times 10^{-3} \times D$  being the slope of the straight line  $(I_{pc})^2 = f(v)$ .

$$\begin{aligned} &\rightarrow 2.2845 \times 10^{-9} = 1.23 \times 10^{-3} \times D \\ &\rightarrow D = 2.2845 \times 10^{-9} / 1.23 \times 10^{-3} \\ &\rightarrow \mathbf{D = 1.86 \times 10^{-6} \text{ cm}^2 \cdot \text{s}^{-1}} \end{aligned}$$

The diffusion coefficients of the two compounds,  $[(\text{Mn}(\text{H}_2\text{O})_3)_2(\text{H}_2\text{W}_{12}\text{O}_{42})]_2^{6-}$  and  $[\text{H}_2\text{W}_{12}\text{O}_{40}]^{6-}$ , are of the same order of magnitude, a clear indication that **1** exists in solution as the monomer having the chemical formula previously presented.

## S1.3. pH Influence

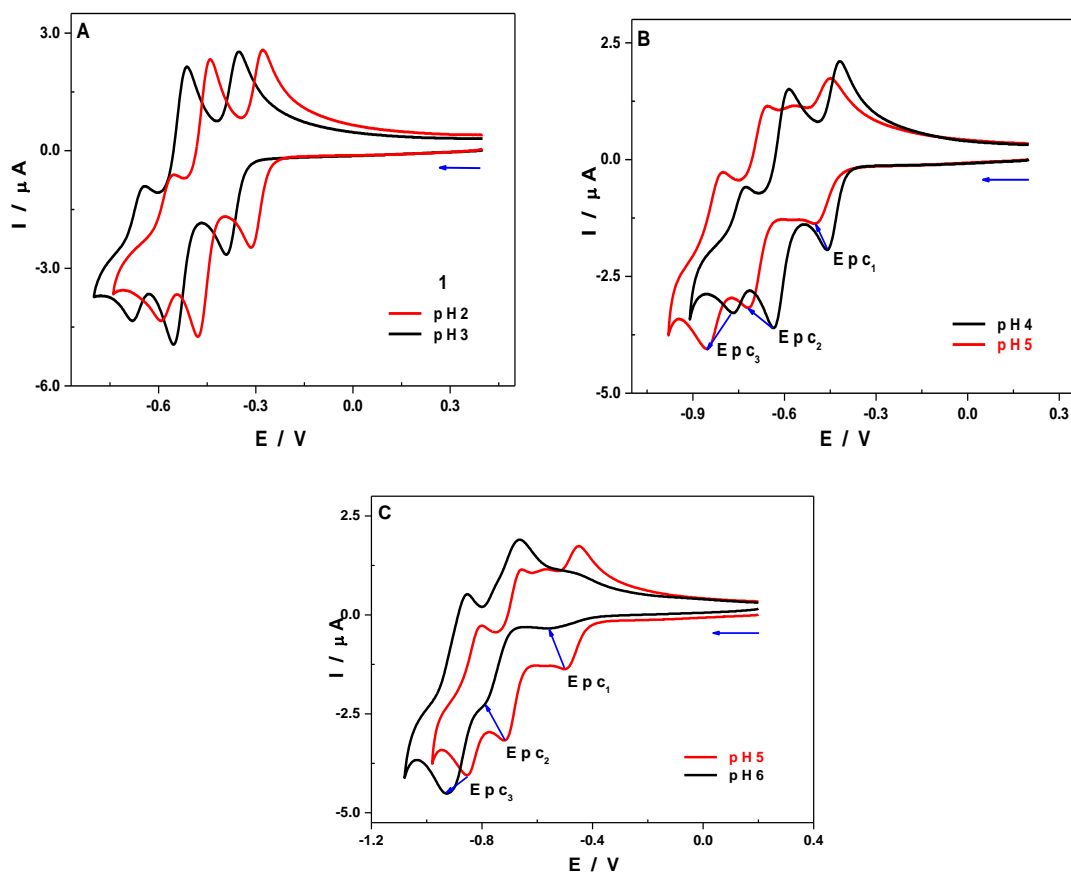

**Figure S3.** CVs of **1** at different pH values; POM concentration: 0.5 mM. Scan rate: 10 mV s<sup>-1</sup>; working electrode: glassy carbon; reference electrode: SCE.

- (A) pH 2 (red line) and pH 3 (black line);  
(B) pH 4 (black line) and pH 5 (red line);  
(C) pH 5 (red line) and pH 6 (black line).

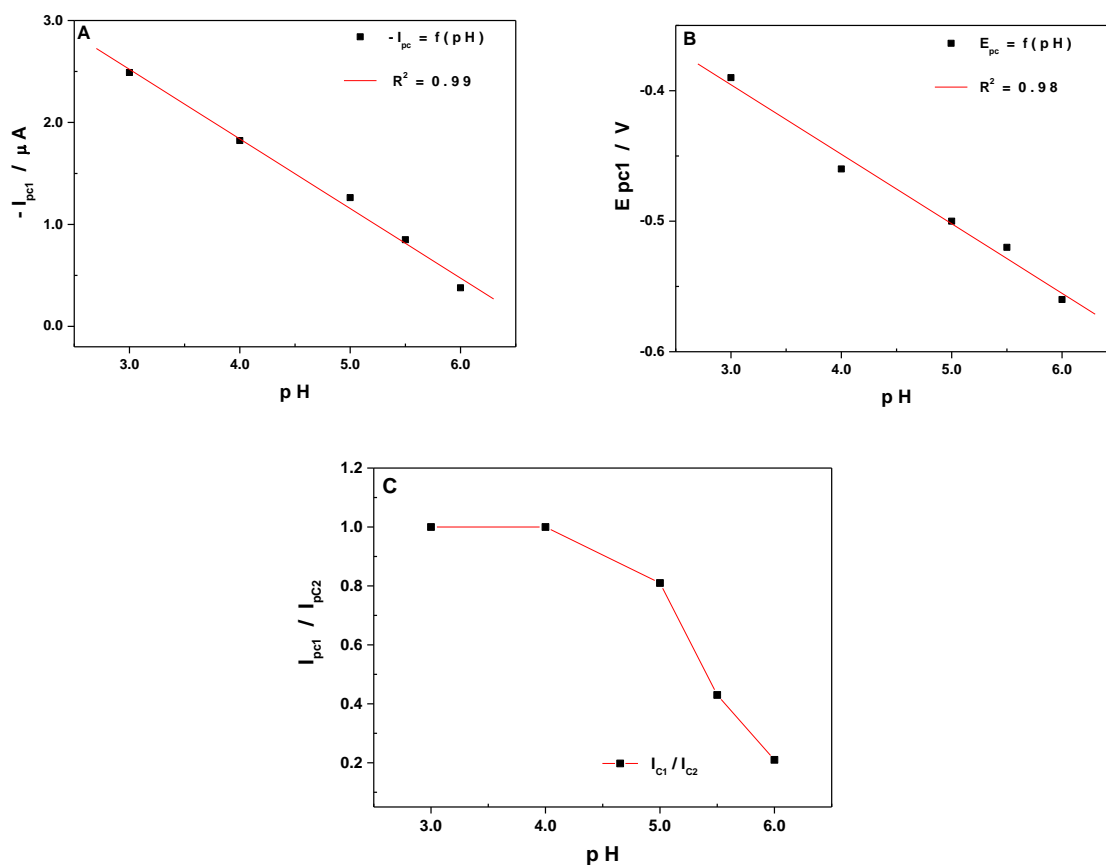

**Figure S4.** (A) Variation of cathodic peak current intensity,  $I_{pc1}$ , for the first wave, as a function of the pH. (B) Variation of the reduction peak potential,  $E_{pc1}$ , for the first wave, as a function of the pH. (C)  $I_{pc1}/I_{pc2}$  as a function of the pH. CVs are recorded at scan rate of  $10 \text{ mV s}^{-1}$ ; working electrode: glassy carbon; reference electrode: SCE.

### S1.4. Electro-Catalytic Reduction of Nitrite and Dioxygen by 1 on GCE

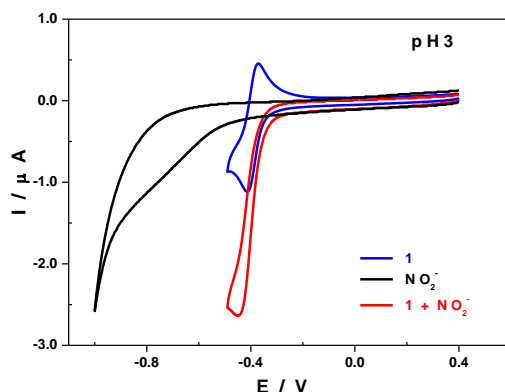

**Figure S5.** CV of **1** only (blue line, concentration: 0.5 mM), in the presence of 40 equivalents of  $\text{NO}_2^-$  and CV of  $\text{NO}_2^-$  only (concentration: 2 mM). Electrolyte: 0.5M  $\text{Li}_2\text{SO}_4 + \text{H}_2\text{SO}_4$  / pH 3; scan rate:  $10 \text{ mV s}^{-1}$ ; working electrode: glassy carbon; reference electrode: SCE.

The formation of manganese oxides film at the working electrode, actually seems to have a positive effect on the electro-catalytic reduction of  $\text{O}_2$ . In fact, when the potential is scanned initially in the positive direction up to +1.0 V vs. SCE, the electro-catalytic wave anodically shifts about 100 mV when compared to the scan started in the negative direction.

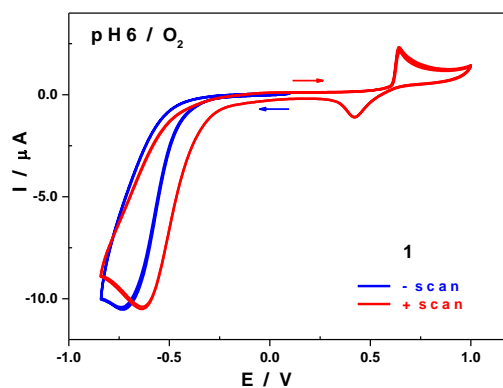

**Figure S6.** Two sets of 2 successive CVs recorded in 1M  $\text{CH}_3\text{COOLi} + \text{CH}_3\text{COOH}$  / pH. Polyoxometalate concentration 0.5 mM; scan rate  $10 \text{ mV s}^{-1}$ ; working electrode: glassy carbon; reference electrode: SCE. Curves in blue: The scan is initially done in the negative potential direction (from +0.1 V to -0.84 V). The peak potential of  $\text{O}_2$  electro-catalytic wave is observed at -0.72 V vs. SCE, with an onset estimated at around -0.36 V. Curves in red: The scan is initially done in the positive potential direction (from 0.1 up to +1.0 V) then in the negative potential direction (down to -0.84 V). The peak potential of the  $\text{O}_2$  electro-catalytic wave is observed at -0.63 V vs. SCE, with an onset estimated at around -0.25 V.

### S1.5. $\text{Mn}^{2+}$ redox steps in **1**, $[\text{Mn}^{\text{II}}(\text{H}_2\text{O})\text{SiW}_{11}\text{O}_{39}]^{6-}$ and $[\text{Mn}^{\text{II}}_4(\text{H}_2\text{O})_2(\text{SiW}_9\text{O}_{34})_2]^{12-}$ [**1**]

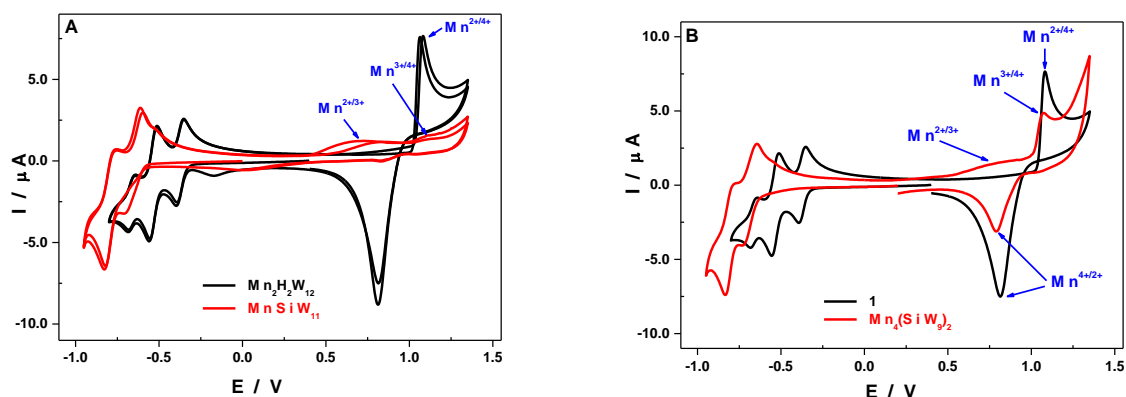

**Figure S7.** CVs obtained in 0.5M  $\text{Li}_2\text{SO}_4 + \text{H}_2\text{SO}_4$  / pH 3; POM concentration 0.5 mM; scan rate  $10 \text{ mV s}^{-1}$ ; working electrode: glassy carbon; reference electrode: SCE.

(A) **1** (black line) and  $[\text{Mn}^{\text{II}}(\text{H}_2\text{O})\text{SiW}_{11}\text{O}_{39}]^{6-}$  (red line).

(B) **1** (black line) and  $[\text{Mn}^{\text{II}}_4(\text{H}_2\text{O})_2(\text{SiW}_9\text{O}_{34})_2]^{12-}$  (red line).

### S1.6. Influence of the Electrolyte at Different pH Values

As stated in the main text, one can observe in Figure SI-9A below that a cycling down to  $-0.3 \text{ V}$  vs. SCE is still not sufficient for a perfect regeneration of the working electrode surface, i.e. a complete removal of the manganese oxides film deposited on the glassy carbon working electrode during the oxidation step. The presence of acetate anions (see Figure SI-9B), which are better coordinating species than sulphate ions, seems to somewhat prevent the formation this manganese oxides film on the working electrode surface; CVs are almost superimposable over successive cycling.

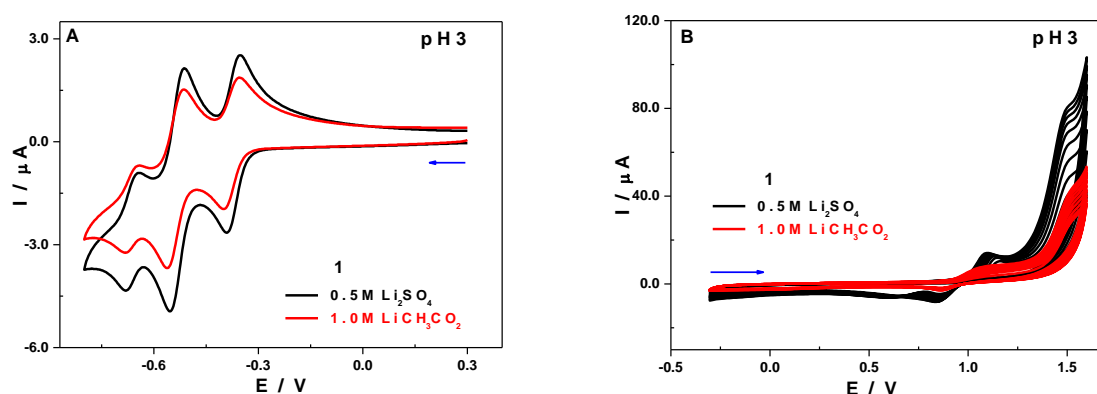

**Figure S8.** CVs of **1** at pH 3 in different media; polyoxometalate concentration: 0.5 mM; scan rate:  $10 \text{ mV s}^{-1}$ ; working electrode: glassy carbon; reference electrode: SCE.

(A) Scanning is done in the negative potential direction of from  $+0.3 \text{ V}$  to  $-0.8 \text{ V}$  in 0.5M  $\text{Li}_2\text{SO}_4 + \text{H}_2\text{SO}_4$  (black line) and in 1M  $\text{CH}_3\text{COOLi} + \text{CH}_3\text{COOH}$  (red line).

(B) Cycling (10 scans)  $-0.30 \text{ V}$  and  $+1.56 \text{ V}$  between in 0.5M  $\text{Li}_2\text{SO}_4 + \text{H}_2\text{SO}_4$  (black line) and in 1M  $\text{CH}_3\text{COOLi} + \text{CH}_3\text{COOH}$  (red line). The scan rate in both cases is  $50 \text{ mV s}^{-1}$ .



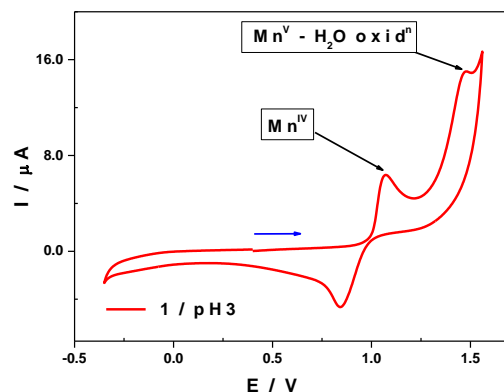

**Figure S9.** CV of **1** in 0.5M  $\text{Li}_2\text{SO}_4 + \text{H}_2\text{SO}_4$  / pH 3. Polyoxometalate concentration: 0.5 mM; scan rate:  $10 \text{ mV s}^{-1}$ ; working electrode: glassy carbon; reference electrode: SCE. Potentials were initially scanned up to +1.56 V ( $\text{Mn}^{5+}$  and  $\text{H}_2\text{O}$  electro-catalytic oxidation) then down to  $-0.30 \text{ V}$  (regeneration of the working electrode surface).

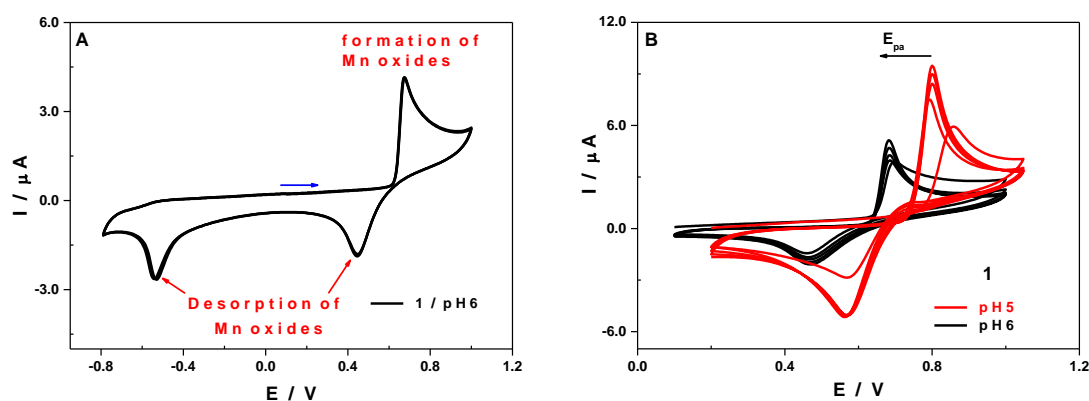

**Figure S10. (A)** CVs of **1** in 1M  $\text{CH}_3\text{COOLi} + \text{CH}_3\text{COOH}$  / pH 6. Cycling (10 cycles) is done between  $-0.79 \text{ V}$  and  $1.00 \text{ V}$ .

**(B)** CVs of **1** in 1M  $\text{CH}_3\text{COOLi} + \text{CH}_3\text{COOH}$ , cycling restricted to the  $\text{Mn}^{2+/4+}$  redox wave: between  $+0.20 \text{ V}$  and  $+1.05 \text{ V}$  for pH 5 (red line) and between  $+0.10 \text{ V}$  and  $+1.00 \text{ V}$  for pH 6 (blue line). Polyoxometalate concentration: 0.5 mM; scan rate:  $10 \text{ mV s}^{-1}$ ; working electrode: glassy carbon; reference electrode: SCE.

From pH 5 to pH 6 the potential gain is about 150mV  $\{E_{\text{pa}}(\text{pH}5) > E_{\text{pa}}(\text{pH}6)\}$ , but the manganese oxides film grows faster at pH 5 than at pH 6  $\{I_{\text{pa}}(\text{pH}5) > I_{\text{pa}}(\text{pH}6)\}$ .

## S2. XPS Spectra

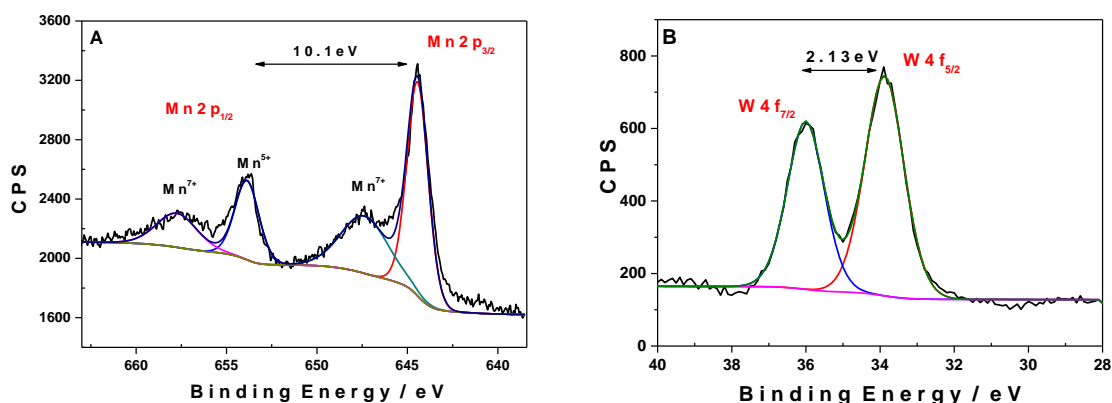

**Figure S11.** XPS survey spectrum for a **1**-modified glassy carbon electrode by induced electrochemical deposition at +1.4 V /SCE in 0.5M Li<sub>2</sub>SO<sub>4</sub> + H<sub>2</sub>SO<sub>4</sub> / pH 3. The POM concentration in the solution was 0.5 mM. (A) Mn 2p core level spectrum (B) W 4f core level spectrum.

## S3. UV-Visible Spectra

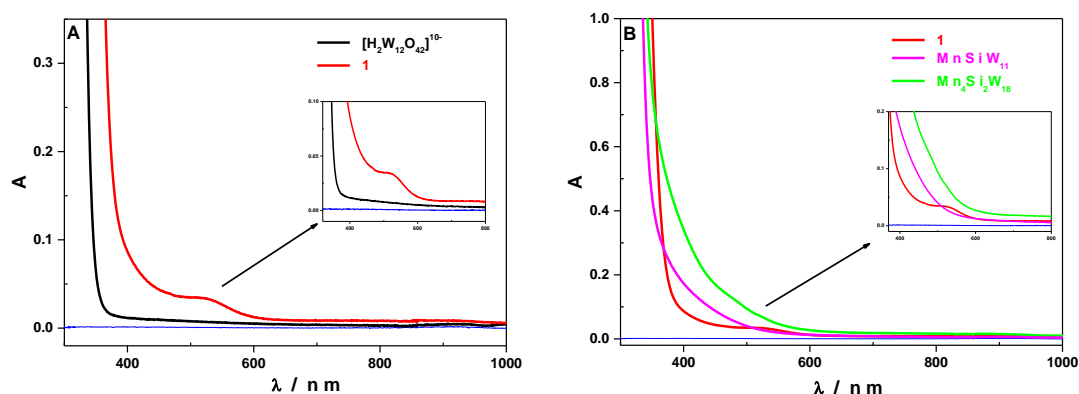

**Figure S12.** UV-visible spectra recorded in 0.5M Li<sub>2</sub>SO<sub>4</sub> + H<sub>2</sub>SO<sub>4</sub> / pH 3. (A) **1** and [H<sub>2</sub>W<sub>12</sub>O<sub>42</sub>]<sup>10-</sup>. (B) **1** and [Mn<sup>II</sup>(H<sub>2</sub>O)SiW<sub>11</sub>O<sub>39</sub>]<sup>6-</sup> and [Mn<sup>II</sup><sub>4</sub>(H<sub>2</sub>O)<sub>2</sub>(SiW<sub>9</sub>O<sub>34</sub>)<sub>2</sub>]<sup>12-</sup>. POM concentration: 0.5 mM.

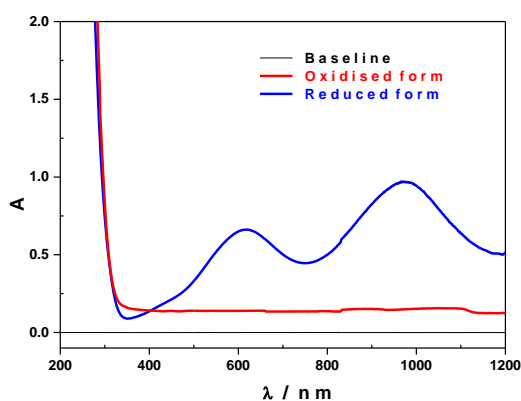

**Figure S13.** UV-visible spectra of **1** recorded in 0.5M Li<sub>2</sub>SO<sub>4</sub> + H<sub>2</sub>SO<sub>4</sub> / pH 3; oxidised form (red) and one-electron reduced form (blue). POM concentration: 0.5 mM.

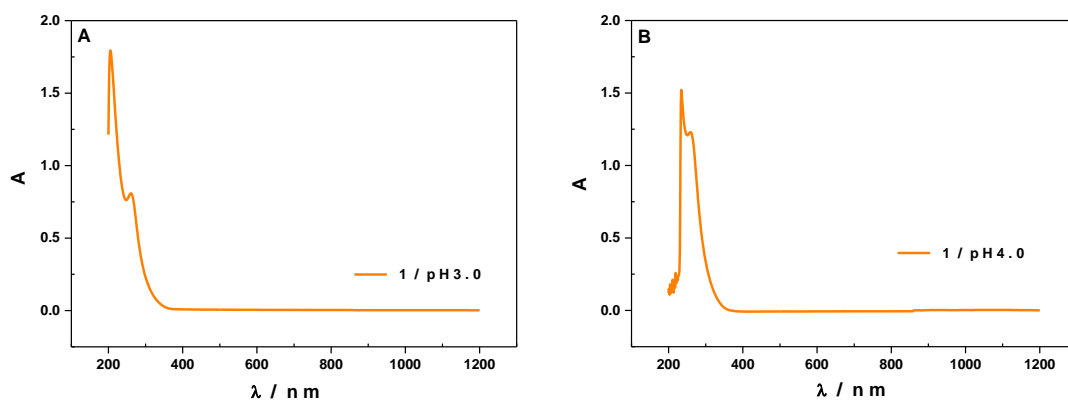

**Figure S14.** UV-visible spectra of 0.15 mM solutions of **1** in (A) 0.5M  $\text{Li}_2\text{SO}_4 + \text{H}_2\text{SO}_4$  / pH 3 and (B) 1M  $\text{CH}_3\text{COOLi} + \text{CH}_3\text{COOH}$  / pH 4.

#### S4. FT-IR Spectra

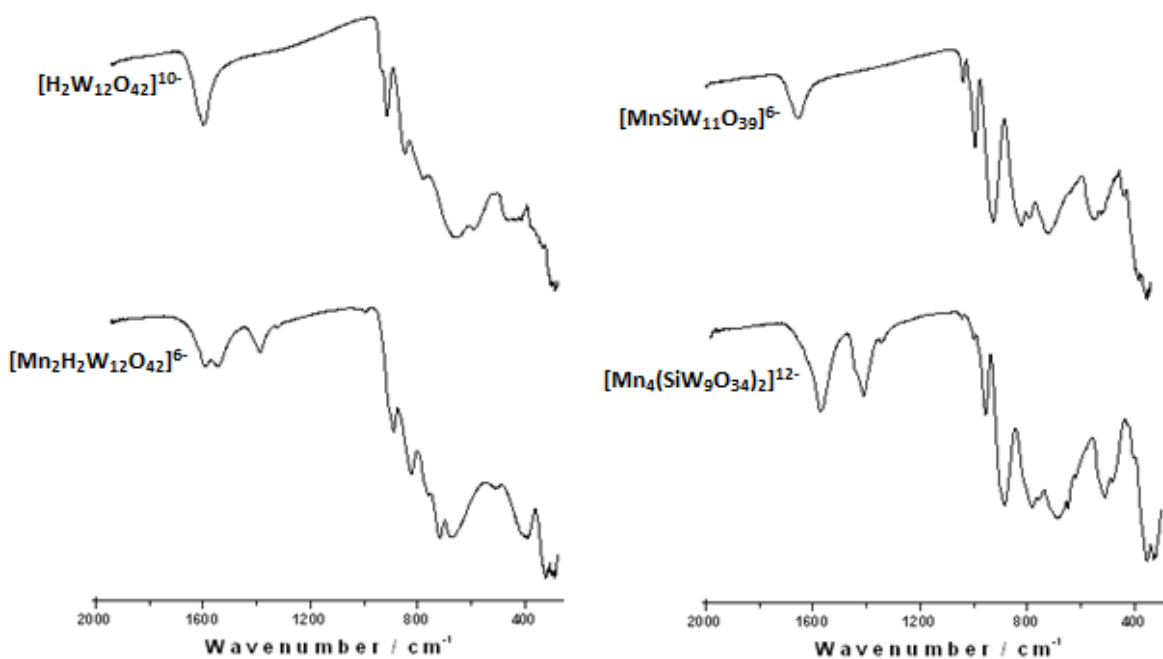

**Figure S15.** FT-IR spectra of **1**,  $[\text{H}_2\text{W}_{12}\text{O}_{42}]^{10-}$ ,  $[\text{Mn}^{\text{II}}(\text{H}_2\text{O})\text{SiW}_{11}\text{O}_{39}]^{6-}$  and  $[\text{Mn}^{\text{II}}_4(\text{H}_2\text{O})_2(\text{SiW}_9\text{O}_{34})_2]^{12-}$ .

## S5. Thermogravimetric Analysis

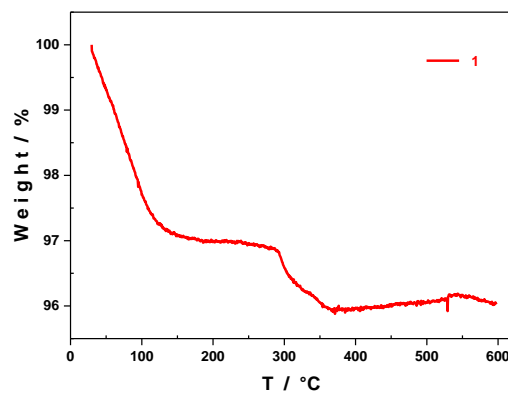

**Figure S16.** Thermogram of **1a** from room temperature to 600 °C.
